# Supplementary material
Source: Elsevier journal article supplement (https://authors.library.caltech.edu/43419/7/mmc1.docx)
Supplement: mmc1 [file mmc1.docx]

**Table S1:** List of AMS radiocarbon ages used for age-depth modeling.

| **Lake** | | **Lab code** | **Core Section** | **Depth in section (cm)** | **Sample material** | **Composite depth (cm)** | **Comp. depth without event layers (cm)** | **14C age (yr BP)** | **± 1σ** | **Calibrated age (cal yr BP)** |
| --- | --- | --- | --- | --- | --- | --- | --- | --- | --- | --- |
| N1 | Lauerz | ETH-32360 | Lau04-01-3A | 69 | leaf | 562 | 470.5 | 1195 | 45 | 985-1260 |
| N1 | Lauerz | ETH-32472 | Lau04-01-4A | 51 | leaf | 799.5 | 657.5 | 1470 | 55 | 1291-1516 |
| N1 | Lauerz | ETH-32361 | Lau04-01-3B | 9 | leaf | 606 | 492 | 2195 | 45 | 2068-2337✧ |
| N1 | Lauerz | ETH-32462 | Lau04-01-4C | 62 | wood | 960 | 802 | 1910 | 55 | 1718-1986 |
|  |  |  |  |  |  |  |  |  |  |  |
| N2 | Baldegg | UZ-4904 | Ba02-7b | 46 | terr. macrofossils | 79 | 70.8 | 300 | 45 | 278-351 |
| N2 | Baldegg | UZ-4905 | Ba02-7b | 58 | leaf | 89.6 | 79.5 | 335 | 55 | 313-396 |
| N2 | Baldegg | UZ-4903 | Ba02-4b | 97 | terr. macrofossils | 175.7 | 147.4 | 785 | 45 | 681-790 |
| N2 | Baldegg | UZ-4690 | Ba97-3-4 | 78 | leaf | 352.5 | 291 | 1625 | 55 | 1433-1628 |
| N2 | Baldegg | UZ-4691 | Ba97-3-5 | 33 | leaf | 402 | 327.9 | 1850 | 65 | 1631-1867 |
| N2 | Baldegg | UZ-4729 | Ba97-3-6 | 17 | leaf | 483.4 | 403.2 | 2800 | 50 | 2757-2898 |
| N2 | Baldegg | UZ-4692 | Ba97-3-6 | 83 | leaf | 551.6 | 466.9 | 3330 | 55 | 3528-3813 |
| N2 | Baldegg | UZ-4693 | Ba97-3-7 | 3 | leaf | 569.6 | 484.6 | 3630 | 70 | 3828-4067 |
| N2 | Baldegg | ETH-38958 | Ba09-2-B2 | 68-69.5 | terr. macrofossils | 660-661.5 | 570.7-572.2 | 4540 | 35 | 5152-5444 |
| N2 | Baldegg | UZ-4695 | Ba97-3-7 | 73 | leaf | 660.75 | 571.45 | 4550 | 65 | 5153-5459 |
| N2 | Baldegg | UZ-4730 | Ba97-3-8 | 49 | leaf | 744.7 | 648.6 | 6335 | 85 | 7007-7287 |
| N2 | Baldegg | ETH-43950 | Ba09-2-B3 | 64.25 | terr. macrofossils | 763.95 | 666.55 | 6615 | 40 | 7436-7566 |
| N2 | Baldegg | UZ-4696 | Ba97-3-9 | 23 | leaf | 830.3 | 721.4 | 7725 | 70 | 8395-8583 |
| N2 | Baldegg | UZ-4731 | Ba97-3-9 | 58 | leaf | 864.2 | 745.9 | 7995 | 80 | 8742-9008 |
|  |  |  |  |  |  |  |  |  |  |  |
| N3 | Seelisberg | UZ-4649 | Sel01-3-I | 25 | leaf | 57 | 32.2 | 365 | 50 | 311-504 |
| N3 | Seelisberg | UZ-4935 | Sel01-5-AII | 77 | leaf | 160 | 155 | 555 | 55 | 510-654✧ |
| N3 | Seelisberg | UZ-4809 | Sel01-5-AIII | 90 | leaf | 224 | 168.6 | 1545 | 50 | 1336-1539 |
| N3 | Seelisberg | UZ-4735 | Sel01-6-BIII | 85 | terr. macrofossils | 238 | 181.1 | 2265 | 50 | 2152-2351✧ |
| N3 | Seelisberg | UZ-4804 | Sel01-6-CII | 5 | leaf | 341 | 244.6 | 2525 | 65 | 2365-2752 |
| N3 | Seelisberg | UZ-4800 | Sel01-5-BIII | 16 | terr. macrofossils | 388 | 268.6 | 2920 | 70 | 2873-3319 |
| N3 | Seelisberg | UZ-4805 | Sel01-6-CIII | 90 | leaf | 489 | 308.5 | 3780 | 55 | 3982-4405 |
| N3 | Seelisberg | UZ-4734 | Sel01-6-DII | 11 | terr. macrofossils | 603 | 363 | 5920 | 75 | 6559-6944✧ |
| N3 | Seelisberg | UZ-4806 | Sel01-6-DII | 96 | terr. macrofossils | 688 | 404.6 | 5400 | 60 | 6001-6299 |
| N3 | Seelisberg | UZ-4808 | Sel01-6-EII | 8 | leaf | 713 | 433.7 | 6695 | 65 | 7460-7669 |
|  |  |  |  |  |  |  |  |  |  |  |
| N4 | Faelen | ETH-39519 | Fae09-5-1B | 40.5 | terr. macrofossils | 150.1 | 120.2 | 1190 | 35 | 989-1237 |
| N4 | Faelen | ETH-39523 | Fae09-6-1A | 12.5 | seed | 214.8 | 172.9 | 1805 | 45 | 1611-1865 |
| N4 | Faelen | ETH-39520 | Fae09-5-2A | 64 | terr. macrofossils | 415.6 | 335.8 | 3065 | 35 | 3169-3369 |
| N4 | Faelen | ETH-42599 | Fae09-5-2B | 58 | needle | 497 | 404.3 | 3680 | 40 | 3898-4146 |
| N4 | Faelen | ETH-39521 | Fae09-5-2C | 57.75 | terr. Macrofossils | 594 | 469.4 | 5255 | 40 | 5925-6179 |
| N4 | Faelen | ETH-39522 | Fae09-6-2B | 70.7 | wood | 637.4 | 503.8 | 6215 | 45 | 7002-7252 |
| N4 | Faelen | ETH-42598 | Fae09-5-3B | 38.6 | wood | 726.8 | 563.8 | 8255 | 40 | 9091-9405 |
|  |  |  |  |  |  |  |  |  |  |  |
| N5 | Hinterburg | Ua-14630 | HIN97-7 | 24 | terr. Macrofossils | 77.7 | 30.4 | 805 | 60 | 660-905 |
| N5 | Hinterburg | Ua-14631 | HIN97-6 | 32 | terr. Macrofossils | 171.1 | 47.9 | 1425 | 60 | 1188-1511 |
| N5 | Hinterburg | ETH-42027 | HIN10-6-1A | 35.8 | wood | 205.4 | 65.1 | 2475 | 40 | 2364-2716 |
| N5 | Hinterburg | ETH-45270 | HIn10-5-1C | 71.75 | terr. macrofossils | 263.5 | 87.9 | 3110 | 25 | 3262-3385 |
| N5 | Hinterburg | ETH-43868 | HIN10-6-1B | 56.7 | terr. macrofossils | 315.8 | 107.9 | 4140 | 35 | 4550-4824 |
| N5 | Hinterburg | ETH-43869 | HIN10-5-2A | 72.4 | terr. macrofossils | 386 | 135.2 | 5455 | 30 | 6205-6303 |
| N5 | Hinterburg | ETH-43870 | HIN10-6-1C | 62.8 | terr. macrofossils | 419.5 | 149.3 | 6230 | 35 | 7015-7254 |
| N5 | Hinterburg | ETH-42025 | HIn10-5-2B | 45.3 | leaf | 457.3 | 167.7 | 7605 | 65 | 8220-8549 |
|  |  |  |  |  |  |  |  |  |  |  |
| N6 | Trueb | ETH-42680 | Tr11-1-2A | 83 | terr. macrofossils | 362.8 | 332.4 | 620 | 40 | 546-662 |
| N6 | Trueb | ETH-42683 | Tr11-2-3B | 73.3 | terr. macrofossils | 529.1 | 475 | 1245 | 35 | 1075-1270 |
| N6 | Trueb | ETH-42681 | Tr11-2-3C | 9 | terr. macrofossils | 641.6 | 573.8 | 1760 | 60 | 1541-1822 |
| N6 | Trueb | ETH-42908 | Tr11-1-3C | 85.8 | wood | 784.5 | 703.4 | 2515 | 35 | 2471-2742 |
|  |  |  |  |  |  |  |  |  |  |  |
| N7 | Glattalp | ETH-44207 | GLA11-5-1B | 68 | terr. macrofossils | 151.7 | 120.5 | 960 | 75 | 726-1052 |
| N7 | Glattalp | ETH-44205 | GLA11-6-2B | 58,5 | terr. macrofossils | 292.9 | 207.1 | 1715 | 35 | 1545-1705 |
| N7 | Glattalp | ETH-45030 | Gla11-5-3A | 82.25 | needle | 671 | 448.8 | 3815 | 55 | 4011-4413 |
| N7 | Glattalp | ETH-45031 | Gla11-5-3C | 80.5 | needle | 859 | 591.2 | 5065 | 55 | 5662-5918 |
| N7 | Glattalp | ETH-45032 | GLA 11-5-4B | 83-85 | terr. macrofossils | 1065.5 | 728.7 | 6750 | 35 | 7569-7669 |
| N7 | Glattalp | ETH-44206 | GLA11-5-5B | 23 | wood | 1255.8 | 861.2 | 8200 | 65 | 9009-9400 |
|  |  |  |  |  |  |  |  |  |  |  |
| N8 | Hinterer Schwendisee | ETH-38342 | HS09-1-1B | 87 | wood | 185.6 | 63.6 | 900 | 30 | 739-910 |
| N8 | Hinterer Schwendisee | ETH-39878 | HS09-2-1B | 14 | terr. macrofossils | 238.6 | 98.5 | 1800 | 50 | 1605-1865 |
| N8 | Hinterer Schwendisee | ETH-45158 | HS09-2-2B | 2.4 | needle | 300.8 | 135.7 | 2425 | 50 | 2349-2703 |
| N8 | Hinterer Schwendisee | ETH-38344 | HS09-1-2B | 73 | wood | 371.4 | 193.2 | 3645 | 35 | 3870-4084 |
| N8 | Hinterer Schwendisee | ETH-39880 | HS09-1-1C | 54 | seed | 423.3 | 233.4 | 4220 | 35 | 4627-4855 |
| N8 | Hinterer Schwendisee | ETH-38343 | HS09-2-2B | 41 | seed | 499.7 | 284.5 | 5795 | 35 | 6496-6672 |
| N8 | Hinterer Schwendisee | ETH-45159 | HS09-2-2C | 51 | leaf | 600 | 379.3 | 9045 | 215 | 9551-10712 |
|  |  |  |  |  |  |  |  |  |  |  |
| N9 | Grimsel | ETH-41797 | Gr10-2-1B | 81.5 | terr. macrofossils | 138 | 121.8 | 1410 | 80 | 1175-1518 |
| N9 | Grimsel | ETH-41798 | Gr10-3-1A | 65.5 | wood | 176.1 | 149.1 | 1895 | 35 | 1730-1922 |
| N9 | Grimsel | ETH-41799 | Gr10-3-1B | 63 | terr. macrofossils | 281.3 | 228.4 | 3230 | 45 | 3372-3561 |
| N9 | Grimsel | ETH-41800 | Gr10-3-1C | 46 | wood | 360.2 | 296.9 | 4320 | 40 | 4832-5030 |
| N9 | Grimsel | ETH-42105 | Gr10-2-2B2 | 13 | wood | 429.9 | 351.9 | 6040 | 35 | 6790-6982 |
| N9 | Grimsel | ETH-41801 | Gr10-2-2C | 13 | wood | 455.1 | 369.3 | 5405 | 175 | 5753-6600✧ |
| N9 | Grimsel | ETH-41802 | Gr10-3-2A | 105 | terr. macrofossils | 523.1 | 424.3 | 8310 | 50 | 9137-9460 |
| N9 | Grimsel | ETH-41803 | Gr10-3-2B | 78.5 | terr. macrofossils | 603 | 467.7 | 8875 | 75 | 9703-10196 |
|  |  |  |  |  |  |  |  |  |  |  |
| N10 | Iffig | Poz-45473 | IFF B1 II | 30.5 | terr. macrofossils | 96.3 | 59.8 | 310 | 30 | 301-466 |
| N10 | Iffig | ETH-41795 | IFF B 2 | 12 | terr. macrofossils | 143.7 | 95 | 755 | 40 | 653-743 |
| N10 | Iffig | Poz-45472 | IFF C3 | 44.3 | terr. macrofossils | 218.4 | 159.2 | 1870 | 35 | 1717-1882 |
| N10 | Iffig | Poz-39380 | IFF C3 | 77.6 | terr. macrofossils | 251.7 | 187.8 | 2460 | 30 | 2363-2705 |
| N10 | Iffig | ETH-42602 | IFF D3 | 25.3 | wood | 298.2 | 229.4 | 3545 | 40 | 3705-3960 |
| N10 | Iffig | Poz-45470 | IFF D3 | 41.3 | terr. macrofossils | 314.2 | 244.67 | 3965 | 35 | 4296-4524 |
| N10 | Iffig | Poz-45474 | IFF D3 | 81.3 | terr. macrofossils | 354.2 | 275.28 | 4500 | 40 | 4980-5305 |
| N10 | Iffig | Poz-45469 | IFF C4 | 69.8 | terr. macrofossils | 370.6 | 288.28 | 4845 | 35 | 5481-5652 |
| N10 | Iffig | ETH-41796 | IFF C4 | 87 | wood | 387.8 | 304.78 | 5350 | 50 | 5996-6277 |
| N10 | Iffig | Poz-39382 | IFF C5 | 37 | terr. macrofossils | 426.4 | 332.18 | 6225 | 35 | 7011-7129 |
| N10 | Iffig | Poz-45468 | IFF D4 | 61.1 | terr. macrofossils | 458.4 | 347.28 | 7140 | 50 | 7848-8043 |
| N10 | Iffig | ETH-42601 | IFF D4 | 93.1 | terr. macrofossils | 490.4 | 370.88 | 7985 | 40 | 8656-9000 |
| N10 | Iffig | ETH-42104 | IFF D5 | 35.5 | terr. macrofossils | 531.1 | 392.18 | 8725 | 45 | 9552-9888 |
| N10 | Iffig | ETH-42600 | IFF D5 | 75.5 | terr. macrofossils | 571.1 | 407.61 | 9035 | 55 | 9928-10292 |
|  |  |  |  |  |  |  |  |  |  |  |
| S1 | Garlate | ETH-45018 | GAR11-05-A2 | 92.5-93.5 | wood remains | 207.7 | 118.0 | 365 | 30 | 316-502 |
| S1 | Garlate | ETH-43298 | GAR11-06-A2 | 34-36 | terr. macrofossils | 324.7 | 188.2 | 1130 | 35 | 960-1169 |
| S1 | Garlate | ETH-44118 | GAR11-05-B3 | 34-35 | wood | 565.7 | 352.0 | 1885 | 30 | 1730-1890 |
| S1 | Garlate | ETH-45019 | GAR11-05-C3 | 78-79 | seed wing | 849.0 | 492.4 | 2500 | 30 | 2467-2732 |
| S1 | Garlate | ETH-43299 | GAR11-06-C2 | 59.5-60 | wood | 925.7 | 541.3 | 2905 | 35 | 2948-3206 |
| S1 | Garlate | ETH-45020 | GAR11-05-D2 | 2.5 | twig | 1007.9 | 604.5 | 3250 | 30 | 3400-3559 |
| S1 | Garlate | ETH-44119 | GAR11-05-D3 | 32.5 | wood | 1139.8 | 701.3 | 3915 | 30 | 4247-4424 |
| S1 | Garlate | ETH-43300 | GAR11-06-D2 | 98 | wood | 1220.7 | 725.6 | 4095 | 40 | 4445-4816 |
| S1 | Garlate | ETH-45021 | GAR11-05-E2 | 22.5-23.5 | wood | 1355.8 | 779.0 | 4485 | 30 | 4981-5293 |
| S1 | Garlate | ETH-44120 | GAR11-05-E3 | 10-11 | wood, leaf remains | 1446.8 | 838.4 | 4870 | 35 | 5486-5662 |
|  |  |  |  |  |  |  |  |  |  |  |
| S2 | Ghirla | ETH-39227 | GHI09-2-A1 | 12-13 | leaf remains | 188.7 | *188.7* | 1055 | 35 | 923-1055 |
| S2 | Ghirla | ETH-43301 | GHI09-1-A3 | 31.5-32.5 | macrofossils, cone | 252.1 | *252.1* | 1495 | 35 | 1306-1514 |
| S2 | Ghirla | ETH-38339 | GH09-2-A2 | 71.5-72.5 | plant remains | 335.2 | *335.2* | 2120 | 35 | 1994-2299 |
| S2 | Ghirla | ETH-39228 | GHI09-2-A3 | 86.5-87.5 | leaf remains | 458.2 | *458.2* | 2680 | 35 | 2748-2850 |
| S2 | Ghirla | ETH-43302 | GHI09-2-B1 | 81.5-82 | wood | 546.3 | *546.3* | 3460 | 35 | 3640-3831 |
| S2 | Ghirla | ETH-39229 | GHI09-1-B3 | 76.5-77.5 | bud leaves | 589.8 | 586.1 | 3840 | 35 | 4150-4409 |
| S2 | Ghirla | ETH-38340 | GH09-2-B3 | 44-45 | wood | 707.5 | 686.9 | 4770 | 35 | 5332-5590 |
| S2 | Ghirla | ETH-39230 | GHI09-2-C1 | 74-75 | fruit | 808.7 | 759.8 | 5645 | 35 | 6318-6496 |
| S2 | Ghirla | ETH-40409 | GHI09-2-C2 | 43-43.5 | branch part | 873.7 | 812.5 | 7160 | 35 | 7883-8029 |
| S2 | Ghirla | ETH-38341 | GH09-2-C3 | 53.5-56 | wood | 981.6 | 871.3 | 8380 | 45 | 9290-9491 |
|  |  |  |  |  |  |  |  |  |  |  |
| S3 | Ledro | POZ-30216 | LL081-P1b | 17 | wood-peat-charcoal | 53.4 | 96.6 | 290 | 30 | 287-458 |
| S3 | Ledro | POZ-30218 | LL081-P1b | 77 | wood-peat-charcoal | 100.7 | 189.6 | 1020 | 30 | 802-1048 |
| S3 | Ledro | POZ-30219 | LL081-A2a | 68 | wood-peat-charcoal | 142.7 | 284.3 | 1445 | 30 | 1297-1386 |
| S3 | Ledro | ETH-39232 | LL082-A1b | 8-9 | leaf remains | 157.8 | 303.9 | 1765 | 35 | 1569-1812 |
| S3 | Ledro | POZ-30220 | LL081-A2a | 113 | wood-peat-charcoal | 178.2 | 334.6 | 1945 | 30 | 1822-1971 |
| S3 | Ledro | POZ-30221 | LL081-A3a | 36 | wood-peat-charcoal | 237.4 | 442.9 | 2520 | 35 | 2488-2744 |
| S3 | Ledro | ETH-40410 | LL082-B1a | 67.5-68.5 | leaf remains | 259.9 | 492.0 | 2890 | 50 | 2876-3208 |
| S3 | Ledro | POZ-27890 | LL081-A3a | 88 | wood-peat-charcoal | 272.5 | 542.4 | 3095 | 30 | 3245-3384 |
| S3 | Ledro | ETH-40411 | LL082-B1b | 86-87 | leaf remaoins | 319.7 | 664.6 | 3575 | 35 | 3728-3978 |
| S3 | Ledro | POZ-27891 | LL081-B2a | 80 | wood-peat-charcoal | 347.6 | 711.8 | 4080 | 35 | 4442-4811 |
| S3 | Ledro | POZ-30223 | LL081-A3b | 91 | wood-peat-charcoal | 375.8 | 762.6 | 4550 | 35 | 5052-5320 |
| S3 | Ledro | ETH-39233 | LL082-A2b | 15.5-16.5 | needles, leaf remains | 392.0 | 839.1 | 5200 | 35 | 5903-6171 |
| S3 | Ledro | POZ-27892 | LL081-B2b | 20 | wood-peat-charcoal | 418.1 | 883.8 | 5720 | 40 | 6413-6635 |
| S3 | Ledro | ETH-39234 | LL082-A2b | 136-137 | needles | 452.7 | 957.8 | 6530 | 40 | 7331-7559 |
| S3 | Ledro | POZ-30224 | LL082-A4a | 46 | wood-peat-charcoal | 483.7 | 1009.8 | 7270 | 50 | 7982-8181 |
| S3 | Ledro | POZ-27894 | LL082-B2b | 109 | wood-peat-charcoal | 511.5 | 1056.9 | 8385 | 35 | 9304-9487 |
| S3 | Ledro | ETH-39235 | LL082-B2a | 107.5-108.5 | needles | 516.9 | 1062.8 | 8405 | 40 | 9307-9522 |
|  |  |  |  |  |  |  |  |  |  |  |
| S4 | Alzasca | ETH-42353 | ALZ10-18-A1 | 55.5 | bark | 80.7 | 17.7 | 595 | 35 | 538-654 |
| S4 | Alzasca | ETH-42354 | ALZ10-18-A3 | 45 | little cone | 249.4 | 43.1 | 1535 | 35 | 1352-1521 |
| S4 | Alzasca | ETH-41055 | ALZ10-19-A2 | 62.5-63 | wood, bark | 328.1 | 61.9 | 2505 | 30 | 2471-2735 |
| S4 | Alzasca | ETH-42355 | ALZ10-18-B1 | 76.5-77.5 | leaf | 403.4 | 77.9 | 3045 | 35 | 3161-3360 |
| S4 | Alzasca | ETH-42356 | ALZ10-18-B2 | 55 | bud | 476.4 | 101.8 | 3970 | 35 | 4297-4526 |
| S4 | Alzasca | ETH-41056 | ALZ10-19-B2 | 24-26 | needles, grass | 597.0 | 127.0 | 5020 | 35 | 5659-5892 |
| S4 | Alzasca | ETH-42907 | ALZ10-20-A2 | 32.5-33.5 | grass, needles | 766.6 | 156.6 | 7625 | 45 | 8367-8539 |
| S4 | Alzasca | ETH-42357 | ALZ10-20-A2 | 38.5-39.5 | wood | 770.0 | 213.0 | 8790 | 40 | 9627-10120✧ |
| S4 | Alzasca | ETH-41057 | ALZ10-20-A3 | 5.8-6.5 | bark | 836.2 | 172.9 | 8655 | 35 | 9541-9686 |
|  |  |  |  |  |  |  |  |  |  |  |
| S5 | Cadagno | ETH-42351 | CAD09-04-A1 | 65.5-66.5 | terr. macrofossils | 103.5 | 49.9 | 1255 | 60 | 1056-1295 |
| S5 | Cadagno | ETH-39236 | CAD09-04-A3 | 12-14 | wood | 224.0 | 88.9 | 2035 | 35 | 1898-2112 |
| S5 | Cadagno | ETH-41051 | CAD09-09-A2 | 72.5-73.5 | terr. macrofossils | 339.7 | 119.4 | 3015 | 35 | 3079-3338 |
| S5 | Cadagno | ETH-39237 | CAD09-09-A3 | 43-46 | wood | 407.8 | 134.1 | 3305 | 35 | 3452-3630 |
| S5 | Cadagno | ETH-41052 | CAD09-04-B3 | 92-93 | wood | 642.2 | 171.4 | 4595 | 35 | 5068-5460 |
| S5 | Cadagno | ETH-39238 | CAD09-08-A1 | 31-31.5 | wood | 684.2 | 176.0 | 5035 | 35 | 5663-5899✧ |
| S5 | Cadagno | ETH-41053 | CAD09-08-A2 | 31-31.5 | terr. macrofossils | 776.4 | 183.0 | 8015 | 35 | 8765-9012✧ |
| S5 | Cadagno | ETH-42352 | CAD09-05-C1 | 13-14 | wood | 802.1 | 192.6 | 6450 | 35 | 7291-7430 |
| S5 | Cadagno | ETH-41054 | CAD09-08-A3 | 30-30.5 | wood | 865.9 | 202.3 | 8055 | 35 | 8776-9079 |

✧ Discarded: sample material derives from mass-movement deposits.
